# Supplementary material
Source: publisher figshare collection journal article supplement (https://acs.figshare.com/ndownloader/files/5698521)
Supplement: Supplementary file 1 [file 5698521]

data_ver38

_audit_creation_method            SHELXL-97
_chemical_name_systematic
;
  ?
;
_chemical_name_common             ?
_chemical_melting_point           ?
_chemical_formula_moiety          ?
_chemical_formula_sum
  'C16 H29 N7 O3.50 P S'
_chemical_formula_weight          438.49

loop_
  _atom_type_symbol
  _atom_type_description
  _atom_type_scat_dispersion_real
  _atom_type_scat_dispersion_imag
  _atom_type_scat_source
  'C'  'C'   0.0033   0.0016
  'International Tables Vol C Tables 4.2.6.8 and 6.1.1.4'
  'H'  'H'   0.0000   0.0000
  'International Tables Vol C Tables 4.2.6.8 and 6.1.1.4'
  'N'  'N'   0.0061   0.0033
  'International Tables Vol C Tables 4.2.6.8 and 6.1.1.4'
  'O'  'O'   0.0106   0.0060
  'International Tables Vol C Tables 4.2.6.8 and 6.1.1.4'
  'P'  'P'   0.1023   0.0942
  'International Tables Vol C Tables 4.2.6.8 and 6.1.1.4'
  'S'  'S'   0.1246   0.1234
  'International Tables Vol C Tables 4.2.6.8 and 6.1.1.4'

_symmetry_cell_setting            ?
_symmetry_space_group_name_H-M    ?

loop_
  _symmetry_equiv_pos_as_xyz
  'x, y, z'
  '-x, -y, -z'

_cell_length_a                    10.7246(5)
_cell_length_b                    13.0474(6)
_cell_length_c                    15.5374(7)
_cell_angle_alpha                 73.3363(10)
_cell_angle_beta                  84.5807(10)
_cell_angle_gamma                 85.4542(10)
_cell_volume                      2070.40(16)
_cell_formula_units_Z             4
_cell_measurement_temperature     173(2)
_cell_measurement_reflns_used     ?
_cell_measurement_theta_min       ?
_cell_measurement_theta_max       ?

_exptl_crystal_description        ?
_exptl_crystal_colour             ?
_exptl_crystal_size_max           0.50
_exptl_crystal_size_mid           0.50
_exptl_crystal_size_min           0.10
_exptl_crystal_density_meas       ?
_exptl_crystal_density_diffrn     1.407
_exptl_crystal_density_method     'not measured'
_exptl_crystal_F_000              932
_exptl_absorpt_coefficient_mu     0.270
_exptl_absorpt_correction_type    ?
_exptl_absorpt_correction_T_min   0.8770
_exptl_absorpt_correction_T_max   0.9735
_exptl_absorpt_process_details    ?

_exptl_special_details
;
  ?
;

_diffrn_ambient_temperature       173(2)
_diffrn_radiation_wavelength      0.71073
_diffrn_radiation_type            MoK\a
_diffrn_radiation_source          'fine-focus sealed tube'
_diffrn_radiation_monochromator   graphite
_diffrn_measurement_device_type   ?
_diffrn_measurement_method        ?
_diffrn_detector_area_resol_mean  ?
_diffrn_standards_number          ?
_diffrn_standards_interval_count  ?
_diffrn_standards_interval_time   ?
_diffrn_standards_decay_%         ?
_diffrn_reflns_number             8403
_diffrn_reflns_av_R_equivalents   0.0000
_diffrn_reflns_av_sigmaI/netI     0.0404
_diffrn_reflns_limit_h_min        -13
_diffrn_reflns_limit_h_max        13
_diffrn_reflns_limit_k_min        -15
_diffrn_reflns_limit_k_max        16
_diffrn_reflns_limit_l_min        0
_diffrn_reflns_limit_l_max        19
_diffrn_reflns_theta_min          1.37
_diffrn_reflns_theta_max          26.37
_reflns_number_total              8403
_reflns_number_gt                 6309
_reflns_threshold_expression      >2sigma(I)

_computing_data_collection        ?
_computing_cell_refinement        ?
_computing_data_reduction         ?
_computing_structure_solution     'SHELXS-97 (Sheldrick, 1990)'
_computing_structure_refinement   'SHELXL-97 (Sheldrick, 1997)'
_computing_molecular_graphics     ?
_computing_publication_material   ?

_refine_special_details
;
  Refinement of F^2^ against ALL reflections.  The weighted R-factor wR and
  goodness of fit S are based on F^2^, conventional R-factors R are based
  on F, with F set to zero for negative F^2^. The threshold expression of
  F^2^ > 2sigma(F^2^) is used only for calculating R-factors(gt) etc. and is
  not relevant to the choice of reflections for refinement.  R-factors based
  on F^2^ are statistically about twice as large as those based on F, and R-
  factors based on ALL data will be even larger.
;

_refine_ls_structure_factor_coef  Fsqd
_refine_ls_matrix_type            full
_refine_ls_weighting_scheme       calc
_refine_ls_weighting_details
  'calc w=1/[\s^2^(Fo^2^)+(0.0720P)^2^+0.0000P] where P=(Fo^2^+2Fc^2^)/3'
_atom_sites_solution_primary      direct
_atom_sites_solution_secondary    difmap
_atom_sites_solution_hydrogens    geom
_refine_ls_hydrogen_treatment     mixed
_refine_ls_extinction_method      none
_refine_ls_extinction_coef        ?
_refine_ls_number_reflns          8403
_refine_ls_number_parameters      530
_refine_ls_number_restraints      2
_refine_ls_R_factor_all           0.0595
_refine_ls_R_factor_gt            0.0420
_refine_ls_wR_factor_ref          0.1258
_refine_ls_wR_factor_gt           0.1180
_refine_ls_goodness_of_fit_ref    1.073
_refine_ls_restrained_S_all       1.073
_refine_ls_shift/su_max           0.005
_refine_ls_shift/su_mean          0.001

loop_
  _atom_site_label
  _atom_site_type_symbol
  _atom_site_fract_x
  _atom_site_fract_y
  _atom_site_fract_z
  _atom_site_U_iso_or_equiv
  _atom_site_adp_type
  _atom_site_occupancy
  _atom_site_symmetry_multiplicity
  _atom_site_calc_flag
  _atom_site_refinement_flags
  _atom_site_disorder_assembly
  _atom_site_disorder_group
S1 S 0.26229(5) 0.33475(4) 0.15997(4) 0.02893(14) Uani 1 1 d . . .
S2 S 0.72895(5) 0.84003(4) 0.17047(3) 0.02649(14) Uani 1 1 d . . .
P1 P 0.71397(5) 0.39051(4) 0.23426(3) 0.02021(13) Uani 1 1 d . . .
P2 P 0.23648(5) 0.88616(4) 0.22757(3) 0.02103(13) Uani 1 1 d . . .
O1 O 0.37611(15) 0.30822(14) 0.11084(10) 0.0437(4) Uani 1 1 d . . .
O2 O 0.15014(15) 0.30234(13) 0.13134(10) 0.0401(4) Uani 1 1 d . . .
O3 O 0.25207(17) 0.44548(12) 0.16232(11) 0.0462(4) Uani 1 1 d . . .
O4 O 0.83619(16) 0.81165(13) 0.11600(10) 0.0453(4) Uani 1 1 d . . .
O5 O 0.61057(15) 0.81195(12) 0.14802(10) 0.0366(4) Uani 1 1 d . . .
O6 O 0.72856(15) 0.95069(11) 0.17241(11) 0.0372(4) Uani 1 1 d . . .
O7 O -0.00225(16) 0.26275(14) 0.00589(12) 0.0396(4) Uani 1 1 d D . .
N1 N 0.70232(16) 0.28482(13) 0.19633(11) 0.0235(4) Uani 1 1 d . . .
N2 N 0.58860(16) 0.46779(13) 0.25093(11) 0.0263(4) Uani 1 1 d . . .
N3 N 0.85684(16) 0.43244(14) 0.23697(11) 0.0270(4) Uani 1 1 d . . .
N4 N 0.71885(15) 0.47349(13) 0.10864(11) 0.0222(4) Uani 1 1 d . . .
N5 N 0.70035(17) 0.31437(15) 0.34849(11) 0.0306(4) Uani 1 1 d . . .
N6 N 0.78584(19) 0.25796(16) 0.38803(12) 0.0382(5) Uani 1 1 d . . .
N7 N 0.8579(2) 0.2042(2) 0.43153(15) 0.0588(7) Uani 1 1 d . . .
N8 N 0.25641(16) 0.77376(13) 0.19443(11) 0.0247(4) Uani 1 1 d . . .
N9 N 0.35768(16) 0.95308(14) 0.23679(11) 0.0273(4) Uani 1 1 d . . .
N10 N 0.09105(15) 0.94210(13) 0.23144(11) 0.0272(4) Uani 1 1 d . . .
N11 N 0.25202(15) 0.96360(13) 0.10019(11) 0.0236(4) Uani 1 1 d . . .
N12 N 0.21764(17) 0.81783(14) 0.34337(11) 0.0295(4) Uani 1 1 d . . .
N13 N 0.28902(18) 0.74332(15) 0.38069(12) 0.0310(4) Uani 1 1 d . . .
N14 N 0.3483(2) 0.67377(17) 0.42223(13) 0.0443(5) Uani 1 1 d . . .
C1 C 0.7350(2) 0.17293(17) 0.24405(16) 0.0410(6) Uani 1 1 d . . .
H1A H 0.7270 0.1275 0.2047 0.061 Uiso 1 1 calc R . .
H1B H 0.6784 0.1501 0.2985 0.061 Uiso 1 1 calc R . .
H1C H 0.8217 0.1665 0.2609 0.061 Uiso 1 1 calc R . .
C2 C 0.6864(2) 0.29899(16) 0.10066(13) 0.0277(5) Uani 1 1 d . . .
H2A H 0.6205 0.2533 0.0942 0.033 Uiso 1 1 calc R . .
H2B H 0.7658 0.2793 0.0698 0.033 Uiso 1 1 calc R . .
C3 C 0.6489(2) 0.41591(16) 0.06064(14) 0.0291(5) Uani 1 1 d . . .
H3A H 0.6726 0.4387 -0.0049 0.035 Uiso 1 1 calc R . .
H3B H 0.5573 0.4295 0.0707 0.035 Uiso 1 1 calc R . .
C4 C 0.4986(2) 0.45369(18) 0.32988(15) 0.0353(5) Uani 1 1 d . . .
H4A H 0.4950 0.5173 0.3518 0.053 Uiso 1 1 calc R . .
H4B H 0.5252 0.3905 0.3774 0.053 Uiso 1 1 calc R . .
H4C H 0.4154 0.4439 0.3132 0.053 Uiso 1 1 calc R . .
C5 C 0.5481(2) 0.55717(16) 0.17572(14) 0.0293(5) Uani 1 1 d . . .
H5A H 0.5219 0.6209 0.1969 0.035 Uiso 1 1 calc R . .
H5B H 0.4762 0.5375 0.1494 0.035 Uiso 1 1 calc R . .
C6 C 0.6580(2) 0.58117(16) 0.10635(14) 0.0287(5) Uani 1 1 d . . .
H6A H 0.6294 0.6182 0.0459 0.034 Uiso 1 1 calc R . .
H6B H 0.7166 0.6265 0.1223 0.034 Uiso 1 1 calc R . .
C7 C 0.8952(2) 0.4634(2) 0.31409(16) 0.0445(6) Uani 1 1 d . . .
H7A H 0.9782 0.4299 0.3296 0.067 Uiso 1 1 calc R . .
H7B H 0.8342 0.4394 0.3658 0.067 Uiso 1 1 calc R . .
H7C H 0.8986 0.5415 0.2982 0.067 Uiso 1 1 calc R . .
C8 C 0.9198(2) 0.49521(18) 0.15223(14) 0.0320(5) Uani 1 1 d . . .
H8A H 1.0093 0.4706 0.1478 0.038 Uiso 1 1 calc R . .
H8B H 0.9150 0.5721 0.1498 0.038 Uiso 1 1 calc R . .
C9 C 0.85422(19) 0.47912(17) 0.07605(14) 0.0301(5) Uani 1 1 d . . .
H9A H 0.8668 0.5397 0.0211 0.036 Uiso 1 1 calc R . .
H9B H 0.8863 0.4119 0.0622 0.036 Uiso 1 1 calc R . .
C10 C 0.27320(19) 0.25530(15) 0.27316(13) 0.0243(4) Uani 1 1 d . . .
C11 C 0.1665(2) 0.22030(18) 0.32798(14) 0.0322(5) Uani 1 1 d . . .
H11 H 0.0862 0.2382 0.3050 0.039 Uiso 1 1 calc R . .
C12 C 0.1768(2) 0.15921(18) 0.41635(15) 0.0342(5) Uani 1 1 d . . .
H12 H 0.1032 0.1344 0.4530 0.041 Uiso 1 1 calc R . .
C13 C 0.2929(2) 0.13349(16) 0.45233(14) 0.0282(5) Uani 1 1 d . . .
C14 C 0.3982(2) 0.17154(17) 0.39712(14) 0.0321(5) Uani 1 1 d . . .
H14 H 0.4782 0.1567 0.4209 0.038 Uiso 1 1 calc R . .
C15 C 0.3896(2) 0.23040(17) 0.30847(14) 0.0300(5) Uani 1 1 d . . .
H15 H 0.4635 0.2540 0.2715 0.036 Uiso 1 1 calc R . .
C16 C 0.3036(2) 0.06635(19) 0.54813(15) 0.0419(6) Uani 1 1 d . . .
H16A H 0.2940 0.1128 0.5882 0.063 Uiso 1 1 calc R . .
H16B H 0.3861 0.0278 0.5536 0.063 Uiso 1 1 calc R . .
H16C H 0.2378 0.0147 0.5650 0.063 Uiso 1 1 calc R . .
C17 C 0.1861(2) 0.67722(17) 0.23599(15) 0.0369(6) Uani 1 1 d . . .
H17A H 0.1189 0.6749 0.1981 0.055 Uiso 1 1 calc R . .
H17B H 0.1497 0.6791 0.2958 0.055 Uiso 1 1 calc R . .
H17C H 0.2430 0.6134 0.2417 0.055 Uiso 1 1 calc R . .
C18 C 0.2937(2) 0.78195(17) 0.09930(13) 0.0313(5) Uani 1 1 d . . .
H18A H 0.2223 0.7673 0.0694 0.038 Uiso 1 1 calc R . .
H18B H 0.3637 0.7291 0.0946 0.038 Uiso 1 1 calc R . .
C19 C 0.3345(2) 0.89466(17) 0.05482(14) 0.0305(5) Uani 1 1 d . . .
H19A H 0.4237 0.9002 0.0635 0.037 Uiso 1 1 calc R . .
H19B H 0.3232 0.9156 -0.0106 0.037 Uiso 1 1 calc R . .
C20 C 0.4307(2) 0.93375(19) 0.31614(15) 0.0384(6) Uani 1 1 d . . .
H20A H 0.4900 0.9903 0.3058 0.058 Uiso 1 1 calc R . .
H20B H 0.4771 0.8640 0.3262 0.058 Uiso 1 1 calc R . .
H20C H 0.3737 0.9341 0.3692 0.058 Uiso 1 1 calc R . .
C21 C 0.4081(2) 1.03659(17) 0.15926(14) 0.0304(5) Uani 1 1 d . . .
H21A H 0.4867 1.0094 0.1324 0.037 Uiso 1 1 calc R . .
H21B H 0.4265 1.0998 0.1781 0.037 Uiso 1 1 calc R . .
C22 C 0.3094(2) 1.06649(16) 0.09192(14) 0.0295(5) Uani 1 1 d . . .
H22A H 0.2460 1.1195 0.1067 0.035 Uiso 1 1 calc R . .
H22B H 0.3477 1.0968 0.0301 0.035 Uiso 1 1 calc R . .
C23 C 0.0309(2) 0.97380(19) 0.30943(16) 0.0419(6) Uani 1 1 d . . .
H23A H 0.0591 1.0437 0.3085 0.063 Uiso 1 1 calc R . .
H23B H 0.0537 0.9203 0.3650 0.063 Uiso 1 1 calc R . .
H23C H -0.0604 0.9785 0.3068 0.063 Uiso 1 1 calc R . .
C24 C 0.0428(2) 1.00836(17) 0.14720(14) 0.0331(5) Uani 1 1 d . . .
H24A H 0.0482 1.0852 0.1424 0.040 Uiso 1 1 calc R . .
H24B H -0.0460 0.9943 0.1451 0.040 Uiso 1 1 calc R . .
C25 C 0.12205(19) 0.97976(17) 0.07098(14) 0.0310(5) Uani 1 1 d . . .
H25A H 0.0946 0.9135 0.0614 0.037 Uiso 1 1 calc R . .
H25B H 0.1166 1.0384 0.0143 0.037 Uiso 1 1 calc R . .
C26 C 0.75262(19) 0.75941(16) 0.28178(13) 0.0231(4) Uani 1 1 d . . .
C27 C 0.8685(2) 0.75710(17) 0.31597(14) 0.0293(5) Uani 1 1 d . . .
H27 H 0.9336 0.7979 0.2795 0.035 Uiso 1 1 calc R . .
C28 C 0.8896(2) 0.69621(17) 0.40225(14) 0.0310(5) Uani 1 1 d . . .
H28 H 0.9690 0.6960 0.4247 0.037 Uiso 1 1 calc R . .
C29 C 0.7962(2) 0.63476(17) 0.45728(14) 0.0282(5) Uani 1 1 d . . .
C30 C 0.6808(2) 0.63767(18) 0.42258(14) 0.0315(5) Uani 1 1 d . . .
H30 H 0.6157 0.5967 0.4589 0.038 Uiso 1 1 calc R . .
C31 C 0.6588(2) 0.69941(17) 0.33571(14) 0.0283(5) Uani 1 1 d . . .
H31 H 0.5791 0.7004 0.3133 0.034 Uiso 1 1 calc R . .
C32 C 0.8208(2) 0.56620(19) 0.55043(15) 0.0407(6) Uani 1 1 d . . .
H32A H 0.8106 0.6104 0.5923 0.061 Uiso 1 1 calc R . .
H32B H 0.9066 0.5342 0.5502 0.061 Uiso 1 1 calc R . .
H32C H 0.7612 0.5093 0.5695 0.061 Uiso 1 1 calc R . .
H7WA H 0.0464(16) 0.2482(17) -0.0351(10) 0.033(7) Uiso 1 1 d D . .
H7WB H 0.0455(18) 0.276(2) 0.0406(13) 0.048(8) Uiso 1 1 d D . .

loop_
  _atom_site_aniso_label
  _atom_site_aniso_U_11
  _atom_site_aniso_U_22
  _atom_site_aniso_U_33
  _atom_site_aniso_U_23
  _atom_site_aniso_U_13
  _atom_site_aniso_U_12
S1 0.0319(3) 0.0250(3) 0.0266(3) -0.0018(2) -0.0037(2) -0.0005(2)
S2 0.0309(3) 0.0202(3) 0.0260(3) -0.0036(2) -0.0013(2) 0.0012(2)
P1 0.0197(3) 0.0194(3) 0.0202(3) -0.0048(2) -0.0001(2) 0.0018(2)
P2 0.0207(3) 0.0183(3) 0.0220(3) -0.0031(2) -0.0016(2) 0.0011(2)
O1 0.0386(10) 0.0527(11) 0.0287(9) 0.0022(8) 0.0046(7) 0.0033(8)
O2 0.0414(10) 0.0440(10) 0.0343(9) -0.0062(8) -0.0126(7) -0.0041(8)
O3 0.0646(12) 0.0223(9) 0.0480(10) -0.0019(8) -0.0115(9) -0.0017(8)
O4 0.0506(11) 0.0486(11) 0.0276(9) -0.0043(8) 0.0073(8) 0.0149(8)
O5 0.0419(10) 0.0291(9) 0.0368(9) -0.0019(7) -0.0148(7) -0.0033(7)
O6 0.0419(10) 0.0199(8) 0.0477(10) -0.0053(7) -0.0056(8) -0.0019(7)
O7 0.0315(10) 0.0447(10) 0.0440(11) -0.0165(9) -0.0021(8) 0.0034(8)
N1 0.0280(9) 0.0171(9) 0.0232(9) -0.0035(7) -0.0001(7) 0.0007(7)
N2 0.0258(9) 0.0237(9) 0.0267(9) -0.0057(8) 0.0020(7) 0.0051(7)
N3 0.0224(9) 0.0304(10) 0.0290(10) -0.0092(8) -0.0036(7) -0.0016(7)
N4 0.0246(9) 0.0182(8) 0.0217(9) -0.0033(7) -0.0002(7) 0.0007(7)
N5 0.0294(10) 0.0348(11) 0.0231(9) -0.0028(8) -0.0026(8) 0.0061(8)
N6 0.0396(12) 0.0427(12) 0.0255(10) 0.0001(9) -0.0007(9) 0.0009(10)
N7 0.0462(14) 0.0696(17) 0.0436(13) 0.0099(12) -0.0133(11) 0.0129(12)
N8 0.0303(10) 0.0191(9) 0.0232(9) -0.0038(7) -0.0014(7) -0.0007(7)
N9 0.0264(10) 0.0267(10) 0.0285(10) -0.0052(8) -0.0069(8) -0.0025(7)
N10 0.0203(9) 0.0235(9) 0.0327(10) -0.0022(8) 0.0014(7) 0.0038(7)
N11 0.0206(9) 0.0211(9) 0.0258(9) -0.0010(7) -0.0035(7) -0.0009(7)
N12 0.0333(10) 0.0274(10) 0.0233(9) -0.0026(8) 0.0003(8) 0.0061(8)
N13 0.0356(11) 0.0314(11) 0.0234(10) -0.0051(8) 0.0030(8) -0.0027(9)
N14 0.0467(13) 0.0400(13) 0.0365(12) 0.0038(10) -0.0086(10) 0.0076(10)
C1 0.0578(16) 0.0205(12) 0.0424(14) -0.0063(10) -0.0090(12) 0.0081(11)
C2 0.0319(12) 0.0262(11) 0.0272(11) -0.0114(9) -0.0003(9) -0.0024(9)
C3 0.0345(12) 0.0283(12) 0.0247(11) -0.0075(9) -0.0039(9) -0.0005(9)
C4 0.0328(13) 0.0294(12) 0.0411(14) -0.0120(10) 0.0137(10) 0.0015(10)
C5 0.0281(12) 0.0237(11) 0.0351(12) -0.0074(9) -0.0067(9) 0.0064(9)
C6 0.0317(12) 0.0190(10) 0.0319(12) -0.0026(9) -0.0044(9) 0.0038(9)
C7 0.0460(15) 0.0494(16) 0.0471(15) -0.0229(13) -0.0153(12) -0.0075(12)
C8 0.0217(11) 0.0301(12) 0.0402(13) -0.0047(10) 0.0025(9) -0.0037(9)
C9 0.0267(12) 0.0267(12) 0.0325(12) -0.0046(9) 0.0084(9) -0.0026(9)
C10 0.0292(11) 0.0177(10) 0.0253(11) -0.0047(9) -0.0024(9) -0.0017(8)
C11 0.0266(12) 0.0347(13) 0.0332(12) -0.0054(10) -0.0043(9) -0.0025(10)
C12 0.0316(13) 0.0376(13) 0.0300(12) -0.0043(10) 0.0031(10) -0.0072(10)
C13 0.0360(13) 0.0218(11) 0.0263(11) -0.0065(9) -0.0027(9) 0.0015(9)
C14 0.0290(12) 0.0335(13) 0.0322(12) -0.0066(10) -0.0064(9) 0.0025(10)
C15 0.0259(11) 0.0292(12) 0.0321(12) -0.0050(10) 0.0004(9) -0.0025(9)
C16 0.0525(16) 0.0387(14) 0.0285(13) -0.0014(11) -0.0034(11) 0.0040(12)
C17 0.0456(14) 0.0242(12) 0.0393(14) -0.0059(10) -0.0001(11) -0.0077(10)
C18 0.0407(13) 0.0287(12) 0.0243(11) -0.0089(9) -0.0030(10) 0.0052(10)
C19 0.0321(12) 0.0338(13) 0.0224(11) -0.0048(9) 0.0002(9) 0.0028(10)
C20 0.0451(14) 0.0323(13) 0.0396(14) -0.0068(11) -0.0196(11) -0.0063(11)
C21 0.0239(11) 0.0268(12) 0.0379(13) -0.0031(10) -0.0034(9) -0.0062(9)
C22 0.0275(11) 0.0216(11) 0.0338(12) 0.0027(9) -0.0030(9) -0.0053(9)
C23 0.0371(14) 0.0376(14) 0.0501(15) -0.0172(12) 0.0071(11) 0.0090(11)
C24 0.0219(11) 0.0274(12) 0.0427(14) 0.0016(10) -0.0044(10) 0.0014(9)
C25 0.0253(11) 0.0286(12) 0.0334(12) 0.0033(10) -0.0120(9) -0.0004(9)
C26 0.0249(11) 0.0207(10) 0.0238(11) -0.0078(9) 0.0007(8) 0.0003(8)
C27 0.0259(11) 0.0272(12) 0.0320(12) -0.0043(10) 0.0022(9) -0.0054(9)
C28 0.0261(12) 0.0349(13) 0.0332(12) -0.0104(10) -0.0049(9) -0.0031(9)
C29 0.0325(12) 0.0279(11) 0.0243(11) -0.0078(9) -0.0015(9) -0.0016(9)
C30 0.0335(13) 0.0329(12) 0.0262(11) -0.0050(10) 0.0036(9) -0.0098(10)
C31 0.0247(11) 0.0324(12) 0.0281(11) -0.0083(10) -0.0027(9) -0.0031(9)
C32 0.0484(15) 0.0397(14) 0.0309(13) -0.0033(11) -0.0069(11) -0.0043(11)

_geom_special_details
;
  All esds (except the esd in the dihedral angle between two l.s. planes)
  are estimated using the full covariance matrix.  The cell esds are taken
  into account individually in the estimation of esds in distances, angles
  and torsion angles; correlations between esds in cell parameters are only
  used when they are defined by crystal symmetry.  An approximate (isotropic)
  treatment of cell esds is used for estimating esds involving l.s. planes.
;

loop_
  _geom_bond_atom_site_label_1
  _geom_bond_atom_site_label_2
  _geom_bond_distance
  _geom_bond_site_symmetry_2
  _geom_bond_publ_flag
S1 O1 1.4496(16) . ?
S1 O3 1.4507(16) . ?
S1 O2 1.4536(16) . ?
S1 C10 1.776(2) . ?
S2 O5 1.4485(16) . ?
S2 O4 1.4507(16) . ?
S2 O6 1.4525(15) . ?
S2 C26 1.777(2) . ?
P1 N2 1.6616(17) . ?
P1 N1 1.6649(16) . ?
P1 N3 1.6754(17) . ?
P1 N5 1.7666(18) . ?
P1 N4 1.9397(17) . ?
P2 N9 1.6612(17) . ?
P2 N10 1.6721(17) . ?
P2 N8 1.6804(17) . ?
P2 N12 1.7643(17) . ?
P2 N11 1.9450(17) . ?
N1 C1 1.467(3) . ?
N1 C2 1.469(2) . ?
N2 C4 1.465(2) . ?
N2 C5 1.466(2) . ?
N3 C8 1.470(3) . ?
N3 C7 1.471(3) . ?
N4 C3 1.483(3) . ?
N4 C9 1.492(3) . ?
N4 C6 1.494(2) . ?
N5 N6 1.225(2) . ?
N6 N7 1.134(3) . ?
N8 C18 1.470(2) . ?
N8 C17 1.471(3) . ?
N9 C21 1.466(3) . ?
N9 C20 1.473(3) . ?
N10 C24 1.461(2) . ?
N10 C23 1.467(3) . ?
N11 C19 1.486(3) . ?
N11 C25 1.487(2) . ?
N11 C22 1.488(2) . ?
N12 N13 1.229(2) . ?
N13 N14 1.138(2) . ?
C2 C3 1.511(3) . ?
C5 C6 1.508(3) . ?
C8 C9 1.504(3) . ?
C10 C11 1.385(3) . ?
C10 C15 1.389(3) . ?
C11 C12 1.386(3) . ?
C12 C13 1.390(3) . ?
C13 C14 1.386(3) . ?
C13 C16 1.505(3) . ?
C14 C15 1.379(3) . ?
C18 C19 1.514(3) . ?
C21 C22 1.509(3) . ?
C24 C25 1.509(3) . ?
C26 C31 1.385(3) . ?
C26 C27 1.392(3) . ?
C27 C28 1.377(3) . ?
C28 C29 1.396(3) . ?
C29 C30 1.389(3) . ?
C29 C32 1.502(3) . ?
C30 C31 1.390(3) . ?

loop_
  _geom_angle_atom_site_label_1
  _geom_angle_atom_site_label_2
  _geom_angle_atom_site_label_3
  _geom_angle
  _geom_angle_site_symmetry_1
  _geom_angle_site_symmetry_3
  _geom_angle_publ_flag
O1 S1 O3 113.15(10) . . ?
O1 S1 O2 112.84(10) . . ?
O3 S1 O2 112.82(10) . . ?
O1 S1 C10 105.72(9) . . ?
O3 S1 C10 106.32(9) . . ?
O2 S1 C10 105.16(9) . . ?
O5 S2 O4 113.44(10) . . ?
O5 S2 O6 113.25(9) . . ?
O4 S2 O6 111.82(10) . . ?
O5 S2 C26 106.56(9) . . ?
O4 S2 C26 104.52(9) . . ?
O6 S2 C26 106.46(9) . . ?
N2 P1 N1 121.35(9) . . ?
N2 P1 N3 118.97(9) . . ?
N1 P1 N3 118.67(9) . . ?
N2 P1 N5 90.80(8) . . ?
N1 P1 N5 93.49(8) . . ?
N3 P1 N5 95.76(9) . . ?
N2 P1 N4 86.98(8) . . ?
N1 P1 N4 85.68(7) . . ?
N3 P1 N4 87.37(8) . . ?
N5 P1 N4 176.77(8) . . ?
N9 P2 N10 119.85(9) . . ?
N9 P2 N8 121.59(9) . . ?
N10 P2 N8 117.49(9) . . ?
N9 P2 N12 95.03(9) . . ?
N10 P2 N12 90.65(8) . . ?
N8 P2 N12 94.50(8) . . ?
N9 P2 N11 85.81(8) . . ?
N10 P2 N11 87.55(8) . . ?
N8 P2 N11 86.40(8) . . ?
N12 P2 N11 178.21(8) . . ?
C1 N1 C2 111.99(16) . . ?
C1 N1 P1 125.95(15) . . ?
C2 N1 P1 120.54(13) . . ?
C4 N2 C5 111.42(16) . . ?
C4 N2 P1 129.08(14) . . ?
C5 N2 P1 119.10(13) . . ?
C8 N3 C7 110.76(18) . . ?
C8 N3 P1 118.41(14) . . ?
C7 N3 P1 122.81(15) . . ?
C3 N4 C9 112.05(16) . . ?
C3 N4 C6 111.94(16) . . ?
C9 N4 C6 112.34(16) . . ?
C3 N4 P1 107.37(12) . . ?
C9 N4 P1 106.05(12) . . ?
C6 N4 P1 106.62(12) . . ?
N6 N5 P1 124.31(15) . . ?
N7 N6 N5 173.8(2) . . ?
C18 N8 C17 110.41(16) . . ?
C18 N8 P2 119.10(13) . . ?
C17 N8 P2 124.05(14) . . ?
C21 N9 C20 112.69(17) . . ?
C21 N9 P2 120.46(14) . . ?
C20 N9 P2 126.73(15) . . ?
C24 N10 C23 111.62(17) . . ?
C24 N10 P2 118.14(13) . . ?
C23 N10 P2 123.98(15) . . ?
C19 N11 C25 112.86(16) . . ?
C19 N11 C22 111.56(16) . . ?
C25 N11 C22 112.49(16) . . ?
C19 N11 P2 106.53(12) . . ?
C25 N11 P2 105.49(12) . . ?
C22 N11 P2 107.38(12) . . ?
N13 N12 P2 123.17(15) . . ?
N14 N13 N12 173.8(2) . . ?
N1 C2 C3 106.55(16) . . ?
N4 C3 C2 104.66(16) . . ?
N2 C5 C6 107.38(16) . . ?
N4 C6 C5 104.16(16) . . ?
N3 C8 C9 107.56(17) . . ?
N4 C9 C8 105.21(16) . . ?
C11 C10 C15 119.22(19) . . ?
C11 C10 S1 120.88(16) . . ?
C15 C10 S1 119.87(16) . . ?
C10 C11 C12 120.1(2) . . ?
C11 C12 C13 121.2(2) . . ?
C14 C13 C12 117.9(2) . . ?
C14 C13 C16 121.1(2) . . ?
C12 C13 C16 121.0(2) . . ?
C15 C14 C13 121.5(2) . . ?
C14 C15 C10 120.1(2) . . ?
N8 C18 C19 107.59(17) . . ?
N11 C19 C18 105.03(16) . . ?
N9 C21 C22 106.90(17) . . ?
N11 C22 C21 104.23(16) . . ?
N10 C24 C25 107.45(16) . . ?
N11 C25 C24 104.80(17) . . ?
C31 C26 C27 119.04(19) . . ?
C31 C26 S2 121.89(16) . . ?
C27 C26 S2 119.08(15) . . ?
C28 C27 C26 120.52(19) . . ?
C27 C28 C29 121.1(2) . . ?
C30 C29 C28 117.9(2) . . ?
C30 C29 C32 121.2(2) . . ?
C28 C29 C32 120.9(2) . . ?
C29 C30 C31 121.2(2) . . ?
C26 C31 C30 120.2(2) . . ?

loop_
  _geom_hbond_atom_site_label_D
  _geom_hbond_atom_site_label_H
  _geom_hbond_atom_site_label_A
  _geom_hbond_distance_DH
  _geom_hbond_distance_HA
  _geom_hbond_distance_DA
  _geom_hbond_angle_DHA
  _geom_hbond_site_symmetry_A
O7 H7WA O4  0.8400(10) 1.970(5) 2.801(2) 170(2) 2_665
O7 H7WB O2  0.8400(10) 1.999(3) 2.837(2) 175(2) .

_diffrn_measured_fraction_theta_max    0.991
_diffrn_reflns_theta_full              26.37
_diffrn_measured_fraction_theta_full   0.991
_refine_diff_density_max    0.419
_refine_diff_density_min   -0.336
_refine_diff_density_rms    0.056
